# Supplementary material for: Tuning BODIPY molecular rotors into the red: sensitivity to viscosity vs. temperature
Source: Royal Society of Chemistry journal article supplement (doi:10.1039/c5tc02954f), 2015-11-09
Supplement: c5tc02954f1.pdf [file c5tc02954f1.pdf]

*Supporting Information for:*

**Tuning BODIPY molecular rotors into the red: sensitivity to viscosity vs temperature**

Thanh Truc Vu,<sup>a</sup> Rachel Méallet-Renault,<sup>b</sup> Gilles Clavier,<sup>b</sup> Boris A. Trofimov<sup>c</sup> and Marina K. Kuimova<sup>a\*</sup>

<sup>a</sup> Chemistry Department, Imperial College London, Exhibition Road, SW7 2AZ, UK

<sup>b</sup> Institut des Sciences Moléculaires d'Orsay, ISMO, UMR 8214, CNRS, Université Paris Sud, 91405 Orsay Cedex, France

<sup>c</sup> PPSM, ENS Cachan, CNRS, UniVerSud, 61 av Président Wilson, F-94230 CACHAN, France

<sup>d</sup> A. E. Favorsky Irkutsk Institute of Chemistry, Siberian Branch of the Russian Academy of Sciences, 1 Favorsky Str., Irkutsk 664033, Russian Federation

**Table of Contents**

|                                                                          |               |
|--------------------------------------------------------------------------|---------------|
| 1. Synthesis and NMR characterisation of compounds <b>2</b> and <b>3</b> | <b>S2-S5</b>  |
| 2. Additional spectroscopic data for compounds 2-4                       | <b>S6-S10</b> |
| 3. References                                                            | <b>S11</b>    |

## 1. Synthesis and NMR characterization details for compounds 2 and 3 and the starting materials

### 1-(phenanthren-9-yl)butan-1-one

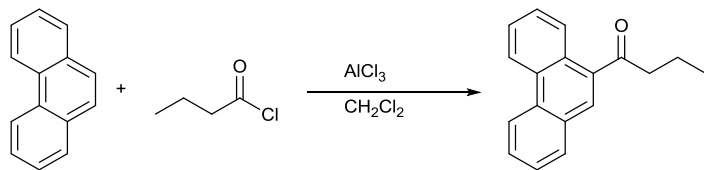

Butyryl chloride (7.94 mL, 0.077 mol) and aluminum trichloride (14.7 g, 0.110 mol) in 30 mL dichloromethane were stirred at 0°C in a round bottom flask. Phenanthrene (12.5 g, 0.070 mol) dissolved in 65 mL of dichloromethane was added dropwise over 40 min. The reaction mixture was brought back to room temperature and stirred for an additional 26 hrs. The reaction mixture was poured onto ice and vigorously stirred until the organic layer became colorless. Diethyl ether was added until the organic layer became less dense than water. The organic layer was separated, washed twice with a saturated NaHCO<sub>3</sub> aqueous solution and finally with brine. The organic layer was dried on MgSO<sub>4</sub> and the solvents removed under reduced pressure. The crude product was purified by column chromatography on silica (eluent: petroleum ether/toluene 1:2 v/v) to afford 1-(phenanthren-9-yl)butan-1-one (9.1 g, 52%).

NMR: <sup>1</sup>H (CDCl<sub>3</sub>) δ: 8.70 (d, J=8.2Hz, 1H), 8.52-8.65 (m, 2H), 8.02 (s, 1H), 7.85 (m, 1H), 7.54-7.73 (m, 4H), 3.07 (t, J=6.9 Hz, 2H), 1.87-1.98 (m, 2H), 1.13 (t, J=7.3 Hz, 3H) ppm.

<sup>13</sup>C (CDCl<sub>3</sub>) δ: 204.6, 135.3, 131.4, 130.6, 129.8, 129.5, 128.9, 128.4, 128.3, 127.2, 126.9, 126.8, 126.5, 122.7, 122.4, 43.9, 18.0, 13.8 ppm.

### 1-(phenanthren-9-yl)butan-1-one oxime

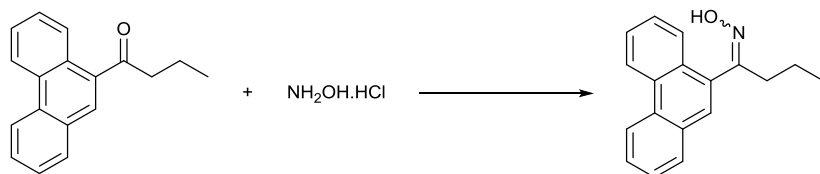

A mixture of 1-(phenanthren-9-yl)butan-1-one (3.10 g, 12.5 mmol) and hydroxylamine hydrochloride (1.08g, 15.6 mmol) in pyridine (40 mL) was heated at 80°C for 16 hrs and then poured into water (100 mL). The crystal precipitates were filtered off, washed with water and dried in vacuo to afford 3.21 g (yield 98%) of the oxime as a white powder.

NMR:  $^1\text{H}$  ( $\text{CDCl}_3$ )  $\delta$ : 10.70 (bs, 1H), 8.77 (d,  $J=7.8\text{Hz}$ , 1H), 8.72 (d,  $J=8.2\text{Hz}$ , 1H), 8.03 (dd,  $J=8.0$  and  $1.1\text{ Hz}$ , 1H), 7.94 (dd,  $J=7.8$  and  $1.4\text{ Hz}$ , 1H), 7.76 (s, 1H), 7.62-7.74 (m, 4H), 2.90 (t,  $J=8.0\text{Hz}$ , 2H), 1.49-1.60 (m, 2H), 0.91 (t,  $J=7.3\text{Hz}$ , 3H).

$^{13}\text{C}$  ( $\text{CDCl}_3$ )  $\delta$ : 161.3, 133.2, 131.0, 130.6, 130.4, 130.2, 128.9, 127.3, 127.2, 126.8, 126.8, 126.7, 126.1, 123.0, 122.5, 32.1, 19.2, 14.3 ppm.

### 3-ethyl-2-(phenanthren-9-yl)-1-vinylpyrrole

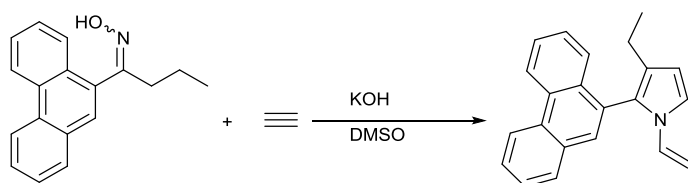

A mixture of 1-(phenanthren-9-yl)butan-1-one oxime (2.50 g, 9.5 mmol) and KOH (0.66 g, 11.9 mmol) in DMSO (100 mL) was heated at  $100^\circ\text{C}$  and acetylene gas was passed through for 2 hrs. The reaction mixture was brought back to room temperature and diluted with water (150 mL), and extracted with diethyl ether ( $6 \times 50\text{ mL}$ ). The extracts were washed with water ( $3 \times 50\text{ mL}$ ) and dried over  $\text{MgSO}_4$ . The residue, obtained after evaporation of the diethyl ether in vacuo, was purified by column chromatography on alumina (eluent, petroleum ether/diethyl ether 3:1 v/v). 3-ethyl-2-(phenanthren-9-yl)-1-vinylpyrrole was isolated in 25% yield (0.71g) with traces amounts of the corresponding pyrrole.

NMR:  $^1\text{H}$  ( $\text{CDCl}_3$ )  $\delta$ : 8.71-8.77 (m, 2H), 7.91 (dd,  $J=7.8$  and  $1.4\text{ Hz}$ , 1H), 7.74 (s, 1H), 7.61-7.73 (m, 3H), 7.51-7.56 (m, 2H), 7.20 (d,  $J=2.8$ , 1H), 6.32-6.43 (m, 2H), 5.00 (dd,  $J=15.8$  and  $1.1\text{ Hz}$ , 1H), 4.33 (dd,  $J=8.9$  and  $1.1\text{ Hz}$ , 1H), 2.29 (q,  $J=7.8\text{ Hz}$ , 2H), 1.05 (t,  $J=7.8\text{ Hz}$ , 2H) ppm.

### 3-ethyl-2-(phenanthren-9-yl)pyrrole

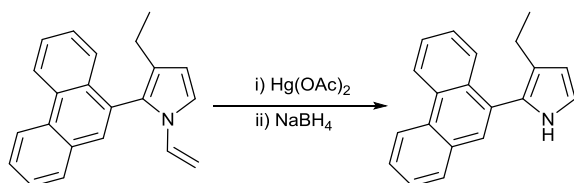

Mercury acetate (2.25 g, 7.1 mmol) in 10% aqueous acetonitrile (25 mL) was added to 3-ethyl-2-(phenanthren-9-yl)-1-vinylpyrrole (0.70 g, 2.4 mmol) in acetonitrile (25 mL) while stirring. The reaction mixture was stirred for 30 min at  $50^\circ\text{C}$ , then sodium borohydride (0.33 g, 8.7 mmol) was added in small portions. After gas evolution was complete, the residue was filtered off. The filtrate was diluted with brine (50 mL), extracted with diethyl ether ( $3 \times 15\text{ mL}$ ), and the combined ether extracts were dried over  $\text{K}_2\text{CO}_3$ . Diethyl ether was removed and the crude product was purified by column chromatography on alumina (eluent, petroleum ether/diethyl ether 4:1 v/v). 3-ethyl-2-

(phenanthren-9-yl)pyrrole was isolated in 39% yield (0.25g)

NMR:  $^1\text{H}$  ( $\text{CDCl}_3$ )  $\delta$ : 8.68-8.77 (m, 2H), 8.11 (bs, 1H), 7.84-7.90 (m, 2H), 7.74 (s, 1H), 7.52-7.71 (m, 4H), 6.90 (s, 1H), 6.33 (s, 1H), 2.45 (q,  $J=7.5$  Hz, 2H), 1.14 (t,  $J=7.5$  Hz, 3H) ppm.

## Bodipy 2:

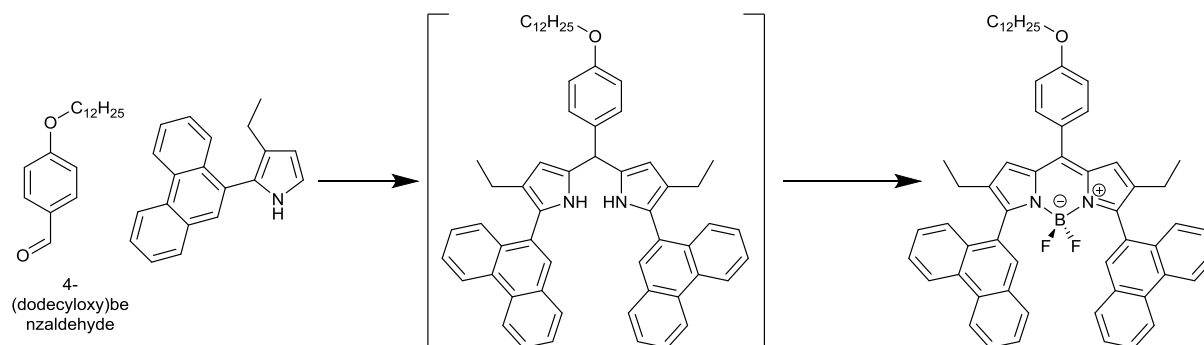

3-ethyl-2-(phenanthren-9-yl)pyrrole (0.10 g, 0.37 mmol) and 4-(dodecyloxy)benzaldehyde<sup>i</sup> (0.054 g, 0.18 mmol) were dissolved in dichloromethane (25 mL) in a one neck round bottom flask and flushed with nitrogen. Then two drops of TFA were added and the obtained solution was stirred for 23 h under nitrogen at room temperature. Then chloranil (0.045 g, 0.18 mmol) was added and the reaction mixture was stirred for 10 min. Diisopropylethylamine (0.23 mL, 1.29 mmol) was added dropwise to the mixture and immediately after boron trifluoride etherate (0.25 mL, 2.03 mmol) was added and the reaction mixture was stirred for 0.5 h. After evaporation of the solvent in vacuo, chromatography was performed on the crude product on silica gel (eluent  $\text{CH}_2\text{Cl}_2$ /petroleum ether=1:3 to 1:2 v:v) to afford BODIPY 2 (0.052 g, 33%).

NMR  $^1\text{H}$  ( $\text{CDCl}_3$ )  $\delta$ : 8.57-8.65 (m, 4H), 7.89 (d, 2H,  $J=\text{XX}$  Hz), 7.69-7.74 (m, 4H), 7.40-7.62 (m, 10H), 7.14 (d,  $J=\text{xx}$ Hz, H<sub>phényl</sub>), 6.85 (s, 2H, H<sub>pyrrole</sub>), 4.12 (t,  $J=6.6$ Hz, 2H, O- $\text{CH}_2$ ); 1.91-2.22 (m, 4H,  $\text{CH}_2$ - $\text{CH}_3$ ), 1.87 (m, 2H, H<sub>11</sub>), 1.52 (m, 2H, H<sub>10</sub>), 1.26-1.34 (m, 16H, H<sub>2</sub>-H<sub>9</sub>), 0.90 (m, 6H;  $\text{CH}_2$ - $\text{CH}_3$ ), 0.86 (t, 3H,  $J=6.6$  Hz, H<sub>1</sub>  $\text{CH}_3$ ) ppm.

$^{13}\text{C}$  ( $\text{CDCl}_3$ )  $\delta$ : 161.0 (Cq), 155.0 (Cq), 137.2 (Cq), 134.5 (Cq), 132.3 (CH), 131.0 (Cq), 130.9 (Cq), 130.6 (Cq), 130.1 (Cq), 129.7 (CH), 129.7 (CH), 129.5 (CH), 128.5 (Cq), 127.1 (CH), 126.9 (CH), 126.7 (CH), 126.6 (CH), 126.5 (CH), 126.4 (CH), 124.5 (Cq), 122.8 (CH), 122.5 (CH), 121.4 (Cq), 114.4 (CH), 68.4 (O- $\text{CH}_2$ ), 32.0 ( $\text{CH}_2$ ), 29.6-29.9 (several  $\text{CH}_2$ ), 29.4 ( $\text{CH}_2$ ), 26.2 ( $\text{CH}_2$ ), 22.8 ( $\text{CH}_2$ ), 19.2 ( $\text{CH}_2$ ), 14.3 ( $\text{CH}_3$ ), 14.2 ( $\text{CH}_3$ ) ppm.

### Bodipy 3:

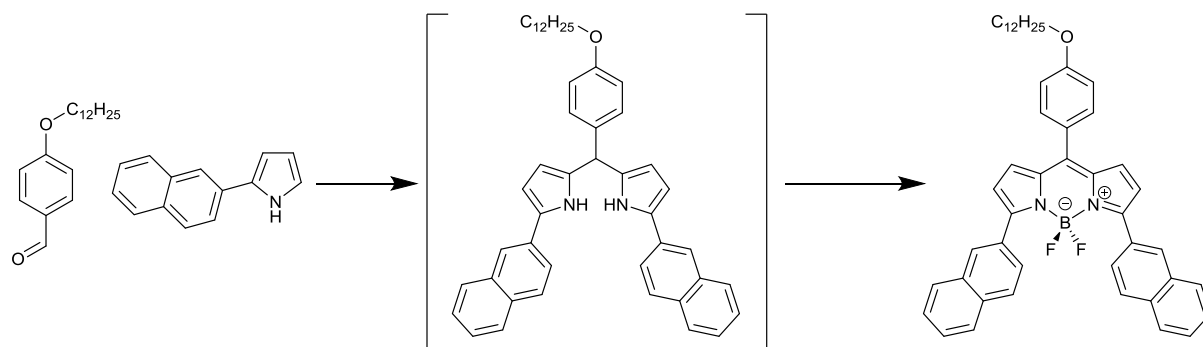

2-(naphthalen-2-yl)-pyrrole<sup>ii</sup> (0.10 g, 0.52 mmol) and 4-(dodecyloxy)benzaldehyde (0.075 g, 0.26 mmol) were dissolved in dichloromethane (25 mL) in a one neck round bottom flask and flushed with nitrogen. Then three drops of TFA were added and the obtained solution was stirred for 23 h under nitrogen at room temperature. Then chloranil (0.064 g, 0.26 mmol) was added and the reaction mixture was stirred for 10 min. Diisopropylethylamine (0.32 mL, 1.81 mmol) was added dropwise to the mixture and immediately after boron trifluoride etherate (0.35 mL, 2.85 mmol) was added and the reaction mixture was stirred for 0.5 h. After evaporation of the solvent in vacuo, chromatography was performed on the crude product on silica gel (eluent  $\text{CH}_2\text{Cl}_2$ /petroleum ether=1:3 to 1:2 v:v) to afford BODIPY 3 (0.06 g, 36%).

NMR  $^1\text{H}$  ( $\text{CDCl}_3$ )  $\delta$ : 8.36 (s, 2H,  $\text{H}_{23}$ ), 8.01 (d, 2H,  $J=8.7\text{ Hz}$ ,  $\text{H}_{25}$ ), 7.81-7.90 (m, 6H), 7.59 (d, 2H,  $J=8.7\text{ Hz}$ ,  $\text{H}_{15}$ ), 7.44-7.51 (m, 4H), 7.07 (d, 2H,  $J=8.2\text{ Hz}$ ,  $\text{H}_{14}$ ), 7.01 (d, 2H,  $J=4.1\text{ Hz}$ ,  $\text{H}_{19}$ ), 6.77 (d, 2H,  $J=4.1\text{ Hz}$ ,  $\text{H}_{20}$ ), 4.08 (t, 2H,  $J=6.6\text{ Hz}$ ,  $\text{H}_{12}$ ), 1.87 (m, 2H,  $\text{H}_{11}$ ), 1.52 (m, 2H,  $\text{H}_{10}$ ), 1.26-1.34 (m, 16H,  $\text{H}_2\text{-H}_9$ ), 0.90 (t, 3H,  $J=6.6\text{ Hz}$ ,  $\text{H}_1$ ) ppm.

$^{13}\text{C}$  ( $\text{CDCl}_3$ )  $\delta$ : 161.3 (Cq), 158.4 (Cq), 144.3 (Cq), 136.8 (Cq), 133.7 (Cq), 133.1 (Cq), 132.6 ( $\text{C}_{15}$ ), 130.9 ( $\text{C}_{19}$ ), 130.3 (Cq), 129.5 ( $\text{C}_{23}$ ), 129.1 (CH), 127.9 (CH), 127.7 (CH), 127.0 (CH), 126.9 ( $\text{C}_{25}$ ), 126.8 (Cq), 126.3 (CH), 121.2 ( $\text{C}_{20}$ ), 114.5 ( $\text{C}_{14}$ ), 68.4 ( $\text{C}_{12}$ ), 32.1 ( $\text{CH}_2$ ), 29.5-29.8 (several  $\text{CH}_2$ ), 29.3 ( $\text{C}_{11}$ ), 26.2 ( $\text{C}_{10}$ ), 22.8 ( $\text{CH}_2$ ), 14.3 ( $\text{C}_1$ ) ppm.

## 2. Additional spectroscopic data

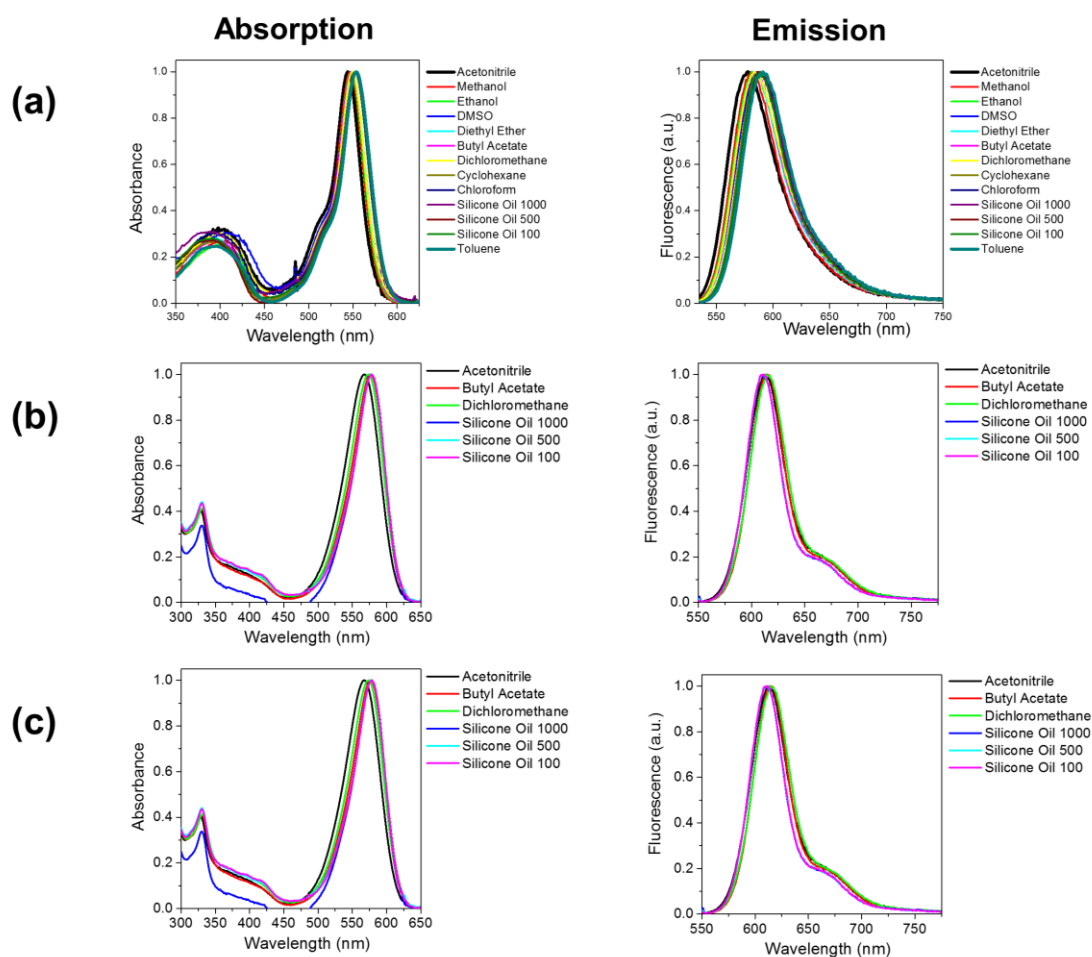

**Figure S1.** Normalized absorption (left) and fluorescence (right) spectra of compounds **2** (a), **3** (b) and **4** (c) in different solvents

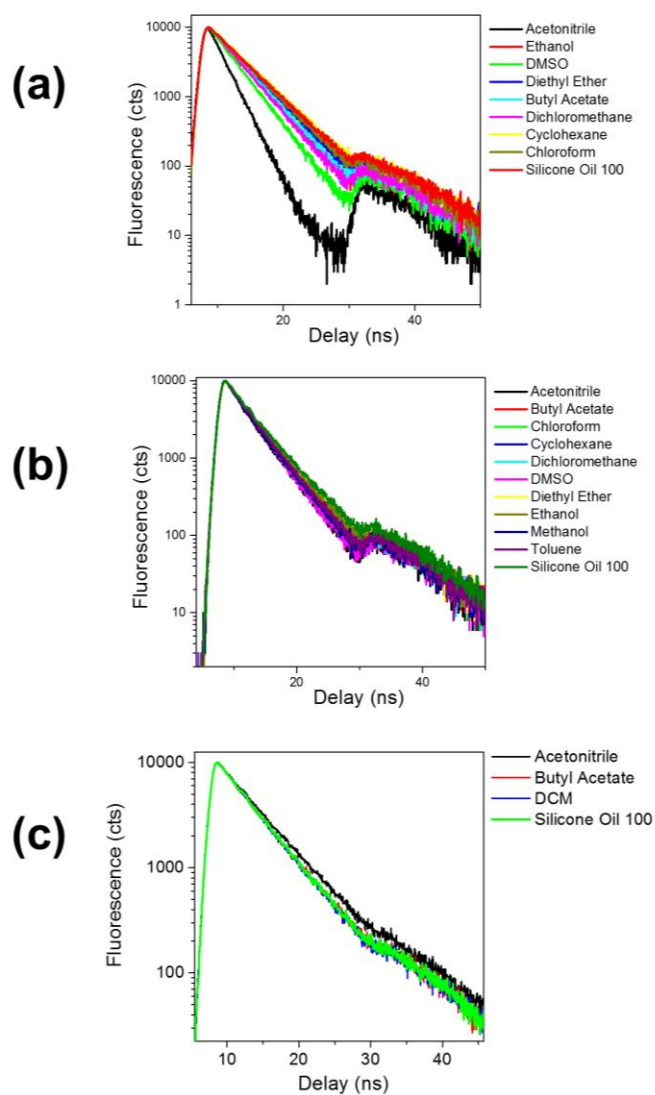

**Figure S2.** Time resolved fluorescence decays recorded for compounds **2** (a), **3** (b) and **4** (c) in different solvents.

Table S1. Spectroscopic properties of compound **2** in different solvents: absorption ( $\lambda_{\text{max, abs}}$ ) and emission ( $\lambda_{\text{max, fluo}}$ ) maximum wavelength, Stokes shift ( $D_{\text{Stokes}}$ ), fluorescence lifetime ( $\tau_{\text{fluo}}$ ) and fluorescence quantum yield ( $\Phi_{\text{fluo}}$ ), radiative ( $k_r$ ) and non radiative ( $k_{nr}$ ) rate constants.

| Solvent           | $\lambda_{\text{max, abs}}$<br>(nm) | $\lambda_{\text{max, fluo}}$<br>(nm) | $D_{\text{Stokes}}$<br>(cm <sup>-1</sup> ) | $\tau_{\text{fluo}}$<br>(ns) | $\chi^2$ | $\Phi_{\text{fluo}}$ | $k_r \times 10^8$<br>(s <sup>-1</sup> ) | $k_{nr} \times 10^8$<br>(s <sup>-1</sup> ) |
|-------------------|-------------------------------------|--------------------------------------|--------------------------------------------|------------------------------|----------|----------------------|-----------------------------------------|--------------------------------------------|
| Acetonitrile      | 544                                 | 577                                  | 1051                                       | 2.21                         | 1.15     | 0.33                 | 1.47                                    | 3.05                                       |
| Methanol          | 547                                 | 581                                  | 1070                                       | 3.24                         | 1.25     | 0.51                 | 1.57                                    | 1.51                                       |
| DMSO              | 548                                 | 587                                  | 1212                                       | 3.48                         | 1.15     | 0.57                 | 1.63                                    | 1.24                                       |
| Dichloromethane   | 549                                 | 584                                  | 1092                                       | 3.91                         | 1.29     | 0.66                 | 1.69                                    | 0.87                                       |
| Ethanol           | 548                                 | 584                                  | 1125                                       | 4                            | 1.27     | 0.66                 | 1.65                                    | 0.85                                       |
| Toluene           | 554                                 | 591                                  | 1130                                       | 4.03                         | 1.14     | 0.75                 | 1.87                                    | 0.61                                       |
| Butyl Acetate     | 549                                 | 585                                  | 1121                                       | 4.11                         | 1.18     | 0.70                 | 1.71                                    | 0.73                                       |
| Diethyl Ether     | 549                                 | 584                                  | 1092                                       | 4.39                         | 1.23     | 0.71                 | 1.63                                    | 0.65                                       |
| Chloroform        | 553                                 | 588                                  | 1076                                       | 4.54                         | 1.18     | 0.76                 | 1.67                                    | 0.53                                       |
| Silicone Oil 100  | 553                                 | 589                                  | 1105                                       | 4.61                         | 1.33     | 0.72                 | 1.56                                    | 0.61                                       |
| Silicone Oil 500  | 553                                 | 587                                  | 1047                                       | 4.62                         | 1.27     | 0.75                 | 1.62                                    | 0.54                                       |
| Silicone Oil 1000 | 552                                 | 588                                  | 1109                                       | 4.67                         | 1.38     | 0.73                 | 1.55                                    | 0.59                                       |
| Cyclohexane       | 552                                 | 587                                  | 1080                                       | 4.81                         | 1.24     | 0.83                 | 1.73                                    | 0.35                                       |

Table S2. Spectroscopic properties of compound **3** in different solvents: absorption ( $\lambda_{\text{max, abs}}$ ) and emission ( $\lambda_{\text{max, fluo}}$ ) maximum wavelength, Stokes shift ( $D_{\text{Stokes}}$ ) and fluorescence quantum yield ( $\Phi_{\text{fluo}}$ ).

| <b>Solvent</b>    | $\lambda_{\text{max, abs}}$<br>(nm) | $\lambda_{\text{max, fluo}}$<br>(nm) | $D_{\text{Stokes}}$<br>(cm <sup>-1</sup> ) | $\Phi_{\text{fluo}}$ |
|-------------------|-------------------------------------|--------------------------------------|--------------------------------------------|----------------------|
| Cyclohexane       | 571                                 | 608                                  | 1065.8                                     | 0.69                 |
| Toluene           | 575                                 | 615                                  | 1131.1                                     | 0.77                 |
| Diethyl Ether     | 568                                 | 609                                  | 1185.3                                     | 0.66                 |
| Butyl acetate     | 570                                 | 612                                  | 1204.0                                     | 0.70                 |
| Chloroform        | 571                                 | 612                                  | 1173.3                                     | 0.71                 |
| Dichloromethane   | 568                                 | 612                                  | 1265.8                                     | 0.66                 |
| Ethanol           | 575                                 | 611                                  | 1024.7                                     | 0.64                 |
| Methanol          | 566                                 | 609                                  | 1247.5                                     | 0.56                 |
| Acetonitrile      | 561                                 | 610                                  | 1431.9                                     | 0.53                 |
| DMSO              | 572                                 | 621                                  | 1379.5                                     | 0.61                 |
| Silicone Oil 1000 | 573                                 | 607                                  | 977.5                                      | 0.77                 |
| Silicone Oil 500  | 573                                 | 607                                  | 977.5                                      | 0.77                 |
| Silicone Oil 100  | 573                                 | 607                                  | 977.5                                      | 0.76                 |

Table S3. Fluorescence quantum yield ( $\Phi_{\text{fluo}}$ ) recorded for compound **4** in different solvents.

| <b>Solvent</b>    | <b><math>\Phi_{\text{fluo}}</math></b> |
|-------------------|----------------------------------------|
| Butyl acetate     | 0.93                                   |
| Dichloromethane   | 0.86                                   |
| Acetonitrile      | 1.00                                   |
| Silicone Oil 1000 | 0.90                                   |
| Silicone Oil 500  | 0.83                                   |
| Silicone Oil 100  | 0.94                                   |

Table S4. SdP parameters<sup>iii</sup> for solvents used in Figure 7, main text.

| <b>Solvent</b>  | <b>SdP parameter<sup>iii</sup></b> |
|-----------------|------------------------------------|
| Acetonitrile    | 0.974                              |
| Methanol        | 0.904                              |
| DMSO            | 1.0                                |
| Dichloromethane | 0.769                              |
| Ethanol         | 0.783                              |
| Toluene         | 0.284                              |
| Butyl Acetate   | 0.535                              |
| Diethyl Ether   | 0.385                              |
| Chloroform      | 0.614                              |
| Cyclohexane     | 0.0                                |

---

<sup>i</sup> Brun, A.; Etemad-Moghadam, G. *Synthesis*, **2002**, 1385-1390.

<sup>ii</sup> Schmidt, E. Y.; Zorina, N. V.; Dvorko, M. Y.; Protsuk, N. I.; Belyaeva, K. V.; Clavier, G.; Méallet-Renault, R.; Vu, T. T.; Mikhaleva A. I; Trofimov B. A. *Chemistry–Eur. J.*, **2011**, *17*, 3069-3073.

<sup>iii</sup> J. Catalán, *J. Phys. Chem. B*, **2009**, *113* (17), pp 5951–5960
